# Supplementary material
Source: ML conference proceedings conference paper supplement (https://proceedings.mlr.press/v97/kool19a.html)
Supplement: Supplementary file 1 [file kool19a-supp.pdf]

## A. Proof of the Gumbel-Top- $k$ trick

**Theorem 1.** For  $k \leq n$ , let  $I_1^*, \dots, I_k^* = \arg \text{top } k G_{\phi_i}$ . Then  $I_1^*, \dots, I_k^*$  is an (ordered) sample without replacement from the Categorical  $\left(\frac{\exp \phi_i}{\sum_{j \in N} \exp \phi_j}, i \in N\right)$  distribution, e.g. for a realization  $i_1^*, \dots, i_k^*$  it holds that

$$P(I_1^* = i_1^*, \dots, I_k^* = i_k^*) = \prod_{j=1}^k \frac{\exp \phi_{i_j^*}}{\sum_{\ell \in N_j^*} \exp \phi_\ell} \quad (15)$$

where  $N_j^* = N \setminus \{i_1^*, \dots, i_{j-1}^*\}$  is the domain (without replacement) for the  $j$ -th sampled element.

*Proof.* First note that

$$\begin{aligned} & P(I_k^* = i_k^* | I_1^* = i_1^*, \dots, I_{k-1}^* = i_{k-1}^*) \\ &= P\left(i_k^* = \arg \max_{i \in N_k^*} G_{\phi_i} \mid I_1^* = i_1^*, \dots, I_{k-1}^* = i_{k-1}^*\right) \\ &= P\left(i_k^* = \arg \max_{i \in N_k^*} G_{\phi_i} \mid \max_{i \in N_k^*} G_{\phi_i} < G_{\phi_{i_{k-1}^*}}\right) \end{aligned} \quad (16)$$

$$= P\left(i_k^* = \arg \max_{i \in N_k^*} G_{\phi_i}\right) \quad (17)$$

$$= \frac{\exp \phi_{i_k^*}}{\sum_{\ell \in N_k^*} \exp \phi_\ell}. \quad (18)$$

The step from (16) to (17) follows from the independence of the max and arg max (Section 2.3) and the step from (17) to (18) uses the Gumbel-Max trick. The proof follows by induction on  $k$ . The case  $k = 1$  is the Gumbel-Max trick, while if we assume the result (15) proven for  $k - 1$ , then

$$\begin{aligned} & P(I_1^* = i_1^*, \dots, I_k^* = i_k^*) \\ &= P(I_k^* = i_k^* | I_1^* = i_1^*, \dots, I_{k-1}^* = i_{k-1}^*) \\ &\quad \cdot P(I_1^* = i_1^*, \dots, I_{k-1}^* = i_{k-1}^*) \\ &= \frac{\exp \phi_{i_k^*}}{\sum_{\ell \in N_k^*} \exp \phi_\ell} \cdot \prod_{j=1}^{k-1} \frac{\exp \phi_{i_j^*}}{\sum_{\ell \in N_j^*} \exp \phi_\ell} \quad (19) \\ &= \prod_{j=1}^k \frac{\exp \phi_{i_j^*}}{\sum_{\ell \in N_j^*} \exp \phi_\ell}. \end{aligned}$$

In (19) we have used Equation (18) and Equation (15) for  $k - 1$  by induction.  $\square$

## B. Sampling set of Gumbels with maximum $T$

### B.1. The truncated Gumbel distribution

A random variable  $G'$  has a *truncated* Gumbel distribution with location  $\phi$  and maximum  $T$  (e.g.  $G' \sim \text{TruncatedGumbel}(\phi, T)$ ) with CDF  $F_{\phi, T}(g)$  if:

$$\begin{aligned} & F_{\phi, T}(g) \\ &= P(G' \leq g) \\ &= P(G \leq g | G \leq T) \\ &= \frac{P(G \leq g \cap G \leq T)}{P(G \leq T)} \\ &= \frac{P(G \leq \min(g, T))}{P(G \leq T)} \\ &= \frac{F_\phi(\min(g, T))}{F_\phi(T)} \\ &= \frac{\exp(-\exp(\phi - \min(g, T)))}{\exp(-\exp(\phi - T))} \\ &= \exp(\exp(\phi - T) - \exp(\phi - \min(g, T))). \end{aligned} \quad (20)$$

The inverse CDF is:

$$F_{\phi, T}^{-1}(u) = \phi - \log(\exp(\phi - T) - \log u). \quad (21)$$

### B.2. Sampling set of Gumbels with maximum $T$

In order to sample a set of Gumbel variables  $\{\tilde{G}_{\phi_i} | \max_i \tilde{G}_{\phi_i} = T\}$ , e.g. with their maximum being *exactly*  $T$ , we can first sample the arg max,  $i^*$  and then sample the Gumbels conditionally on both the max and arg max:

1. Sample  $i^* \sim \text{Categorical}\left(\frac{\exp \phi_i}{\sum_j \exp \phi_j}\right)$ . We do not need to condition on  $T$  since the arg max  $i^*$  is independent of the max  $T$  (Section 2.3).
2. Set  $\tilde{G}_{\phi_{i^*}} = T$ , since this follows from conditioning on the max  $T$  and arg max  $i^*$ .
3. Sample  $\tilde{G}_{\phi_i} \sim \text{TruncatedGumbel}(\phi_i, T)$  for  $i \neq i^*$ . This works because, conditioning on the max  $T$  and arg max  $i^*$ , it holds that:
 
$$P(\tilde{G}_{\phi_i} < g | \max_i \tilde{G}_{\phi_i} = T, \arg \max_i \tilde{G}_{\phi_i} = i^*, i \neq i^*) \\ = P(\tilde{G}_{\phi_i} < g | \tilde{G}_{\phi_i} < T).$$

Equivalently, we can let  $G_{\phi_i} \sim \text{Gumbel}(\phi_i)$ , let  $Z = \max_i G_{\phi_i}$  and define

$$\begin{aligned} \tilde{G}_{\phi_i} &= F_{\phi_i, T}^{-1}(F_{\phi_i, Z}(G_{\phi_i})) \\ &= \phi_i - \log(\exp(\phi_i - T) \\ &\quad - \exp(\phi_i - Z) + \exp(\phi_i - G_{\phi_i})) \\ &= -\log(\exp(-T) - \exp(-Z) + \exp(-G_{\phi_i})). \end{aligned} \quad (22)$$

Here we have used (20) and (21). Since the transformation (22) is monotonically increasing, it preserves the arg max and it follows from the Gumbel-Max trick (3) that

$$\arg \max_i \tilde{G}_{\phi_i} = \arg \max_i G_{\phi_i} \sim \text{Categorical} \left( \frac{\exp \phi_i}{\sum_j \exp \phi_j} \right).$$

We can think of this as using the Gumbel-Max trick for step 1 (sampling the argmax) in the sampling process described above. Additionally, for  $i = \arg \max_i G_{\phi_i}$ :

$$\tilde{G}_{\phi_i} = F_{\phi_i, T}^{-1}(F_{\phi_i, Z}(G_{\phi_i})) = F_{\phi_i, T}^{-1}(F_{\phi_i, Z}(Z)) = T$$

so here we recover step 2 (setting  $\tilde{G}_{\phi_{i^*}} = T$ ). For  $i \neq \arg \max_i G_{\phi_i}$  it holds that:

$$\begin{aligned} & P(\tilde{G}_{\phi_i} \leq g | i \neq \arg \max_i G_{\phi_i}) \\ &= \mathbb{E}_Z(P(\tilde{G}_{\phi_i} \leq g | Z, i \neq \arg \max_i G_{\phi_i})) \\ &= \mathbb{E}_Z(P(\tilde{G}_{\phi_i} \leq g | Z, G_{\phi_i} < Z)) \\ &= \mathbb{E}_Z(P(F_{\phi_i, T}^{-1}(F_{\phi_i, Z}(G_{\phi_i})) \leq g | Z, G_{\phi_i} < Z)) \\ &= \mathbb{E}_Z(P(G_{\phi_i} \leq F_{\phi_i, Z}^{-1}(F_{\phi_i, T}(g)) | Z, G_{\phi_i} < Z)) \\ &= \mathbb{E}_Z(F_{\phi_i, Z}(F_{\phi_i, T}^{-1}(F_{\phi_i, T}(g)))) \\ &= \mathbb{E}_Z(F_{\phi_i, T}(g)) = F_{\phi_i, T}(g). \end{aligned}$$

This means that  $\tilde{G}_{\phi_i} \sim \text{TruncatedGumbel}(\phi_i, T)$ , so this is equivalent to step 3 (sampling  $\tilde{G}_{\phi_i} \sim \text{TruncatedGumbel}(\phi_i, T)$  for  $i \neq i^*$ ).

### B.3. Numeric stability of truncated Gumbel computation

Direct computation of (22) can be unstable as large terms need to be exponentiated. Instead, we compute:

$$v_i = T - G_{\phi_i} + \log 1 \text{mexp}(G_{\phi_i} - Z) \quad (23)$$

$$\tilde{G}_{\phi_i} = T - \max(0, v_i) - \log 1 \text{pexp}(-|v_i|) \quad (24)$$

where we have defined

$$\begin{aligned} \log 1 \text{mexp}(a) &= \log(1 - \exp(a)), \quad a \leq 0 \\ \log 1 \text{pexp}(a) &= \log(1 + \exp(a)). \end{aligned}$$

This is equivalent as

$$\begin{aligned} & T - \max(0, v_i) - \log(1 + \exp(-|v_i|)) \\ &= T - \log(1 + \exp(v_i)) \\ &= T - \log(1 + \exp(T - G_{\phi_i} + \log(1 - \exp(G_{\phi_i} - Z)))) \\ &= T - \log(1 + \exp(T - G_{\phi_i})(1 - \exp(G_{\phi_i} - Z))) \\ &= T - \log(1 + \exp(T - G_{\phi_i}) - \exp(T - Z)) \\ &= -\log(\exp(-T) + \exp(-G_{\phi_i}) - \exp(-Z)) \\ &= \tilde{G}_{\phi_i} \end{aligned}$$

The first step can be easily verified by considering the cases  $v_i < 0$  and  $v_i \geq 0$ .  $\log 1 \text{mexp}$  and  $\log 1 \text{pexp}$  can be computed accurately using  $\log 1 \text{p}(a) = \log(1 + a)$  and  $\exp 1 \text{m}(a) = \exp(a) - 1$  (Mächler, 2012):

$$\begin{aligned} \log 1 \text{mexp}(a) &= \begin{cases} \log(-\exp 1 \text{m}(a)) & a > -0.693 \\ \log 1 \text{p}(-\exp(a)) & \text{otherwise} \end{cases} \\ \log 1 \text{pexp}(a) &= \begin{cases} \log 1 \text{p}(\exp(a)) & a < 18 \\ x + \exp(a) & \text{otherwise} \end{cases} \end{aligned}$$

## C. Numerical stability of importance weights

We have to take care computing the importance weights as depending on the entropy the terms in the quotient  $\frac{p_{\theta}(\mathbf{y}_i|\mathbf{x})}{q_{\theta}(\mathbf{y}_i|\mathbf{x})}$  can become very small, and in our case the computation of  $P(G_{\phi_i} > \kappa) = 1 - \exp(-\exp(\phi_i - \kappa))$  can suffer from catastrophic cancellation. We can rewrite this expression using the more numerically stable implementation  $\exp 1 \text{m}(x) = \exp(x) - 1$  as  $p(G_{\phi_i} > \kappa) = -\exp 1 \text{m}(-\exp(\phi_i - \kappa))$  but in some cases this still suffers from instability as  $\exp(\phi_i - \kappa)$  can underflow if  $\phi_i - \kappa$  is small. Instead, for  $\phi_i - \kappa < -10$  we use the identity

$$\log(1 - \exp(-z)) = \log(z) - \frac{z}{2} + \frac{z^2}{24} - \frac{z^4}{2880} + \mathcal{O}(z^6)$$

to directly compute the log importance weight using  $z = \exp(\phi_i - \kappa)$  and  $\phi_i = \log p_{\theta}(\mathbf{y}_i|\mathbf{x})$  (we assume  $\phi_i$  is normalized):

$$\begin{aligned} & \log \left( \frac{p_{\theta}(\mathbf{y}_i|\mathbf{x})}{q_{\theta}(\mathbf{y}_i|\mathbf{x})} \right) = \log p_{\theta}(\mathbf{y}_i|\mathbf{x}) - \log q_{\theta}(\mathbf{y}_i|\mathbf{x}) \\ &= \log p_{\theta}(\mathbf{y}_i|\mathbf{x}) - \log(1 - \exp(-\exp(\phi_i - \kappa))) \\ &= \log p_{\theta}(\mathbf{y}_i|\mathbf{x}) - \log(1 - \exp(-z)) \\ &= \log p_{\theta}(\mathbf{y}_i|\mathbf{x}) - \left( \log(z) - \frac{z}{2} + \frac{z^2}{24} - \frac{z^4}{2880} + \mathcal{O}(z^6) \right) \\ &= \log p_{\theta}(\mathbf{y}_i|\mathbf{x}) - \left( \phi_i - \kappa - \frac{z}{2} + \frac{z^2}{24} - \frac{z^4}{2880} + \mathcal{O}(z^6) \right) \\ &= \kappa + \frac{z}{2} - \frac{z^2}{24} + \frac{z^4}{2880} + \mathcal{O}(z^6) \end{aligned}$$

If  $\phi_i - \kappa < -10$  then  $0 < z < 10^{-6}$  so this computation will not lose any significant digits.

## D. Proof of unbiasedness of priority sampling estimator

The following proof is adapted from the proofs by [Duffield et al. \(2007\)](#) and [Vieira \(2017\)](#). For generality of the proof, we write  $f(i) = f(\mathbf{y}^i)$ ,  $p_i = p_\theta(\mathbf{y}^i|\mathbf{x})$  and  $q_i(\kappa) = q_{\theta, \kappa}(\mathbf{y}^i|\mathbf{x})$ , and we consider general keys  $h_i$  (not necessarily Gumbel perturbations).

We assume we have a probability distribution over a finite domain  $1, \dots, n$  with normalized probabilities  $p_i$ , e.g.  $\sum_{i=1}^n p_i = 1$ . For a given function  $f(i)$  we want to estimate the expectation

$$\mathbb{E}[f(i)] = \sum_{i=1}^n p_i f(i).$$

Each element  $i$  has an associated random key  $h_i$  and we define  $q_i(a) = P(h_i > a)$ . This way, if we know the threshold  $a$  it holds that  $q_i(a) = P(i \in S)$  is the probability that element  $i$  is in the sample  $S$ . As was noted by [Vieira \(2017\)](#), the actual distribution of the key does not influence the unbiasedness of the estimator but does determine the effective sampling scheme. Using the Gumbel perturbed log-probabilities as keys (e.g.  $h_i = G_{\phi_i}$ ) is equivalent to the PPSWOR scheme described by [Vieira \(2017\)](#).

We define shorthand notation  $h_{1:n} = \{h_1, \dots, h_n\}$ ,  $h_{-i} = \{h_1, \dots, h_{i-1}, h_{i+1}, \dots, h_n\} = h_{1:n} \setminus \{h_i\}$ . For a given sample size  $k$ , let  $\kappa$  be the  $(k+1)$ -th largest element of  $h_{1:n}$ , so  $\kappa$  is the *empirical threshold*. Let  $\kappa'_i$  be the  $k$ -th largest element of  $h_{-i}$  (the  $k$ -th largest of all *other* elements).

Similar to [Duffield et al. \(2007\)](#) we will show that every element  $i$  in our sample contributes an unbiased estimate of  $\mathbb{E}[f(i)]$ , so that the total estimator is unbiased. Formally, we will prove that

$$\mathbb{E}_{h_{1:n}} \left[ \frac{\mathbb{1}_{\{i \in S\}}}{q_i(\kappa)} \right] = 1 \quad (25)$$

from which the result follows:

$$\begin{aligned} & \mathbb{E}_{h_{1:n}} \left[ \sum_{i \in S} \frac{p_i}{q_i(\kappa)} f(i) \right] \\ &= \mathbb{E}_{h_{1:n}} \left[ \sum_{i=1}^n \frac{p_i}{q_i(\kappa)} f(i) \mathbb{1}_{\{i \in S\}} \right] \\ &= \sum_{i=1}^n p_i f(i) \cdot \mathbb{E}_{h_{1:n}} \left[ \frac{\mathbb{1}_{\{i \in S\}}}{q_i(\kappa)} \right] \\ &= \sum_{i=1}^n p_i f(i) \cdot 1 = \sum_{i=1}^n p_i f(i) = \mathbb{E}[f(i)] \end{aligned}$$

To prove (25), we make use of the observation (slightly rephrased) by [Duffield et al. \(2007\)](#) that conditioning on

$h_{-i}$ , we know  $\kappa'_i$  and the event  $i \in S$  implies that  $\kappa = \kappa'_i$  since  $i$  will only be in the sample if  $h_i > \kappa'_i$  which means that  $\kappa'_i$  is the  $k+1$ -th largest value of  $h_{-i} \cup \{h_i\} = h_{1:n}$ . The reverse is also true (if  $\kappa = \kappa'_i$  then  $h_i$  must be larger than  $\kappa'_i$  since otherwise the  $k+1$ -th largest value of  $h_{1:n}$  will be smaller than  $\kappa'_i$ ).

$$\begin{aligned} & \mathbb{E}_{h_{1:n}} \left[ \frac{\mathbb{1}_{\{i \in S\}}}{q_i(\kappa)} \right] \\ &= \mathbb{E}_{h_{-i}} \left[ \mathbb{E}_{h_i} \left[ \frac{\mathbb{1}_{\{i \in S\}}}{q_i(\kappa)} \middle| h_i \right] \right] \\ &= \mathbb{E}_{h_{-i}} \left[ \mathbb{E}_{h_i} \left[ \frac{\mathbb{1}_{\{i \in S\}}}{q_i(\kappa)} \middle| h_{-i}, i \in S \right] P(i \in S | h_{-i}) \right. \\ & \quad \left. + \mathbb{E}_{h_i} \left[ \frac{\mathbb{1}_{\{i \in S\}}}{q_i(\kappa)} \middle| h_{-i}, i \notin S \right] P(i \notin S | h_{-i}) \right] \\ &= \mathbb{E}_{h_{-i}} \left[ \mathbb{E}_{h_i} \left[ \frac{1}{q_i(\kappa)} \middle| h_{-i}, i \in S \right] P(i \in S | h_{-i}) + 0 \right] \\ &= \mathbb{E}_{h_{-i}} \left[ \mathbb{E}_{h_i} \left[ \frac{1}{q_i(\kappa)} \middle| h_{-i}, i \in S \right] q_i(\kappa'_i) \right] \\ &= \mathbb{E}_{h_{-i}} \left[ \mathbb{E}_{h_i} \left[ \frac{1}{q_i(\kappa)} \middle| \kappa = \kappa'_i \right] q_i(\kappa'_i) \right] \\ &= \mathbb{E}_{h_{-i}} \left[ \mathbb{E}_{h_i} \left[ \frac{1}{q_i(\kappa'_i)} \right] q_i(\kappa'_i) \right] \\ &= \mathbb{E}_{h_{-i}} \left[ \frac{1}{q_i(\kappa'_i)} q_i(\kappa'_i) \right] = \mathbb{E}_{h_{-i}} [1] = 1 \end{aligned}$$
